# Supplementary material
Source: PubMed Central journal article supplement (PMC5951174)

Supplemental Figure 1

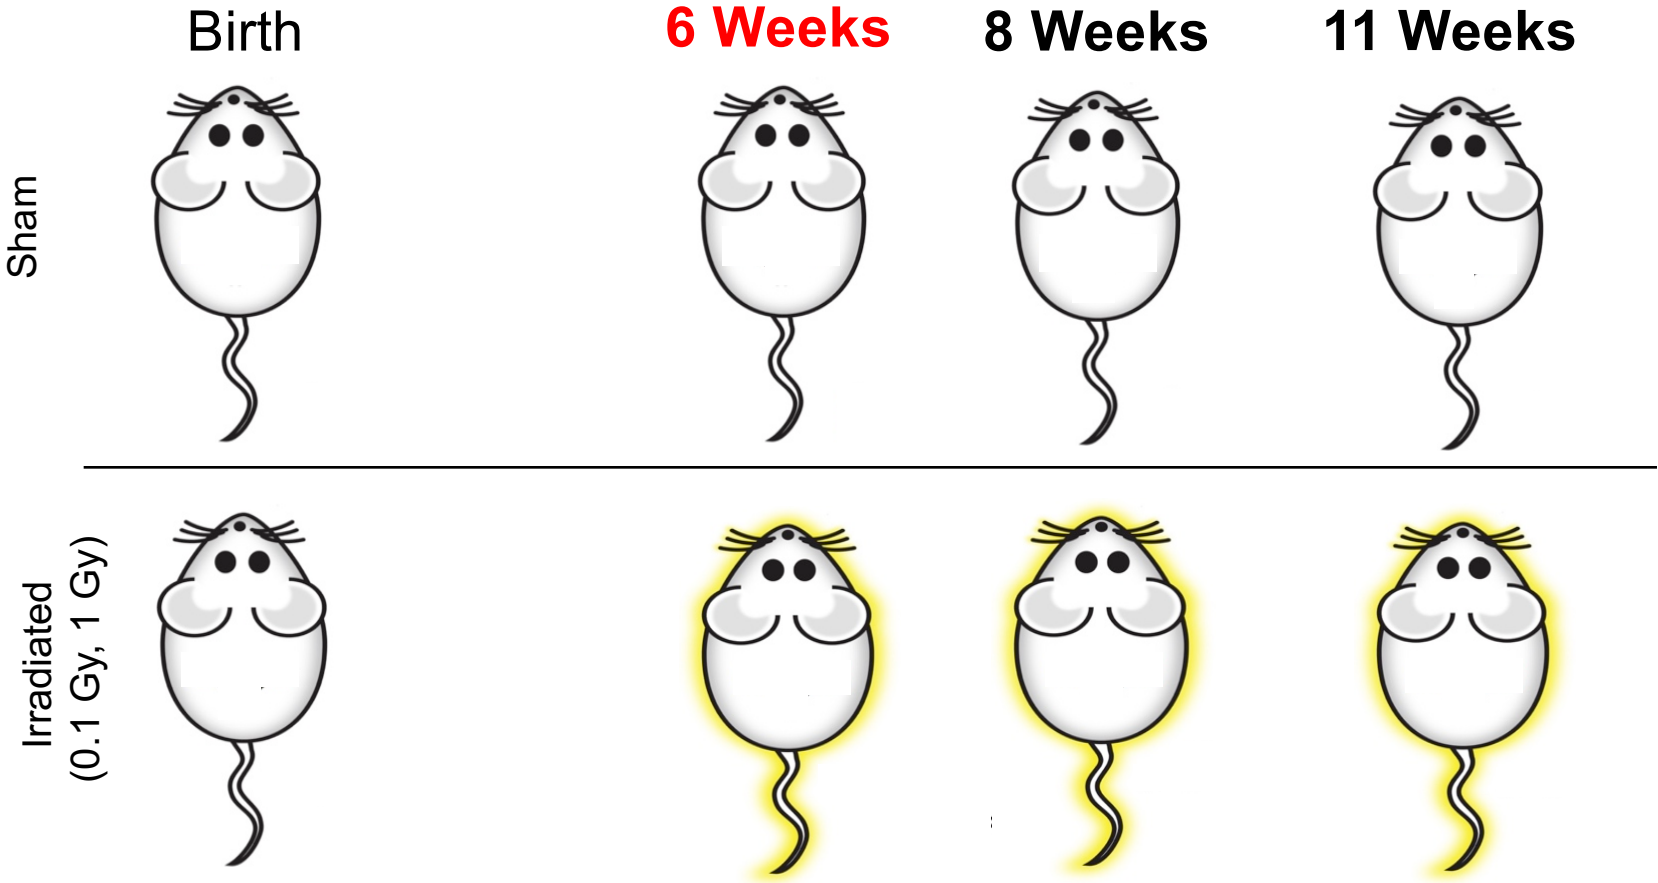

Supplement: NIHMS960551-supplement-01.pdf [file NIHMS960551-supplement-01.pdf]

Supplemental Figure 2

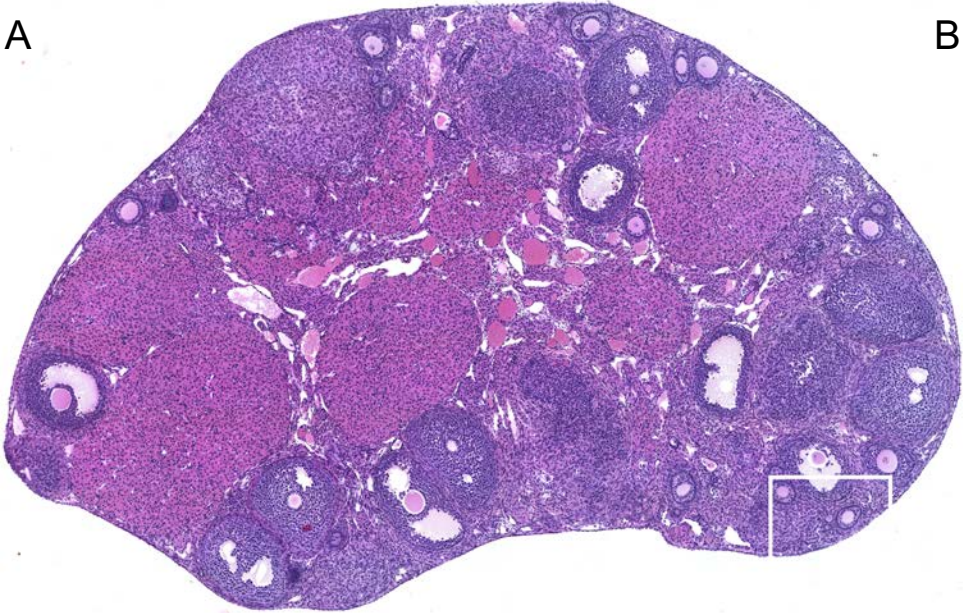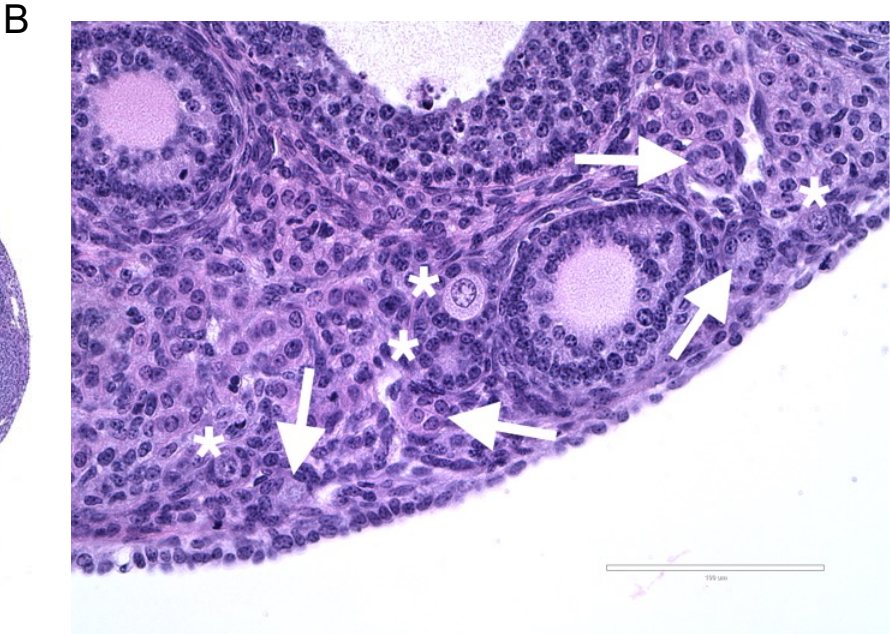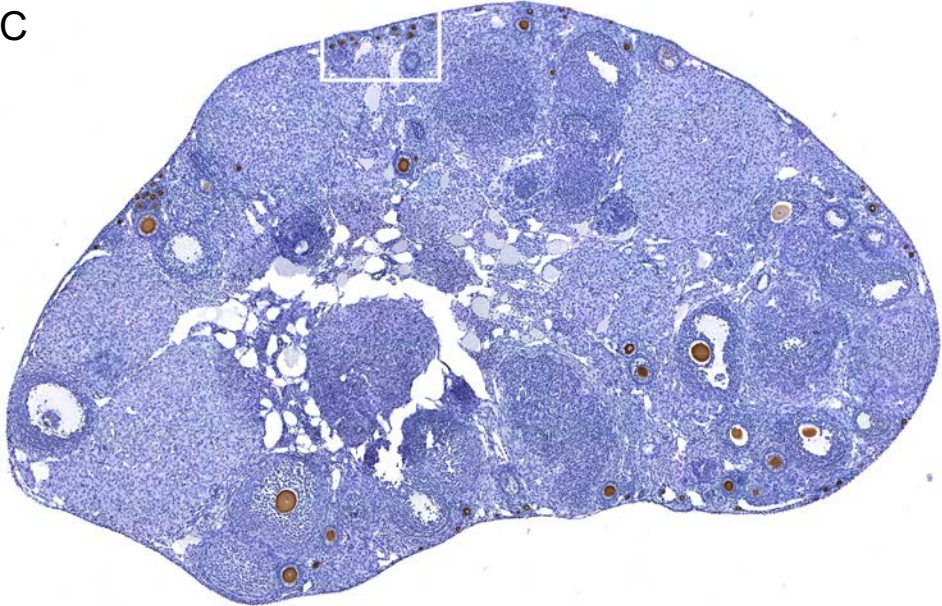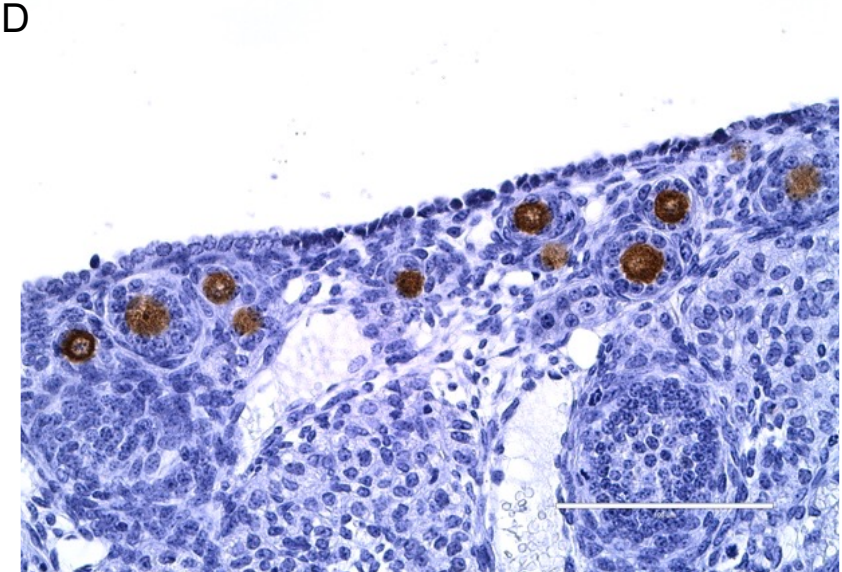

Supplement: NIHMS960551-supplement-02.pdf [file NIHMS960551-supplement-02.pdf]

Supplemental Figure 3

0.1 Gy, 2 weeks

0.1 Gy, 5 weeks

A

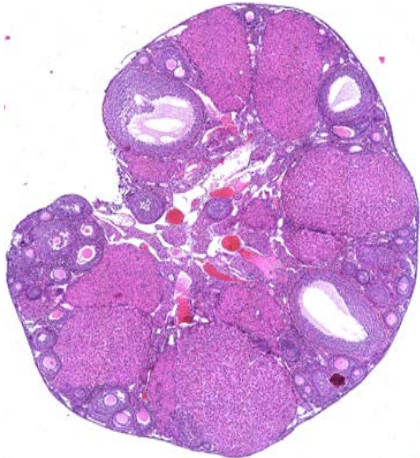

B

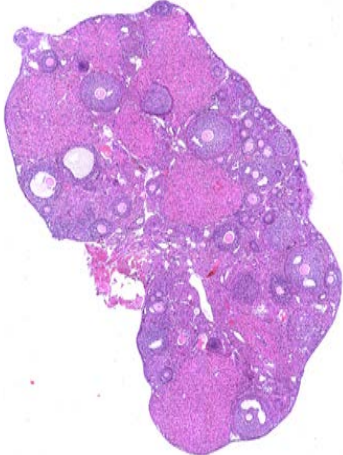

C

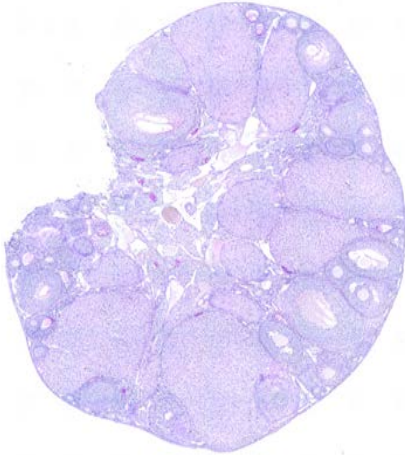

D

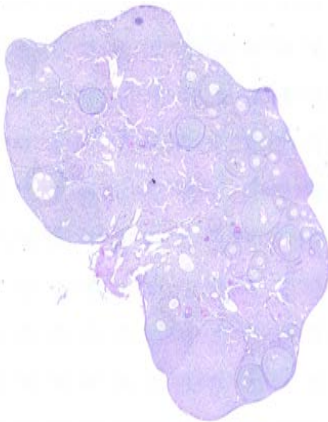

E

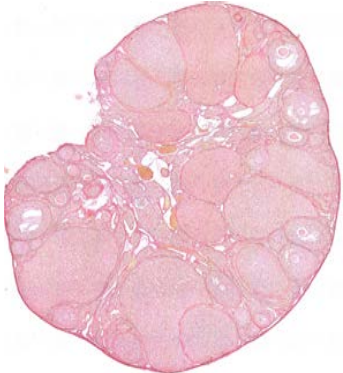

F

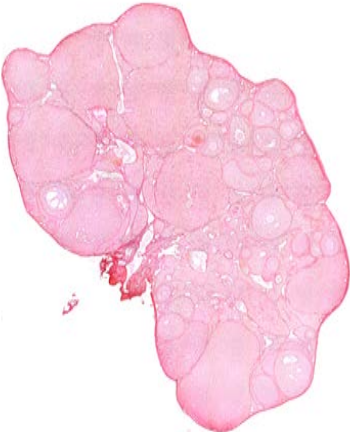

Supplement: NIHMS960551-supplement-03.pdf [file NIHMS960551-supplement-03.pdf]

Supplemental Figure 4

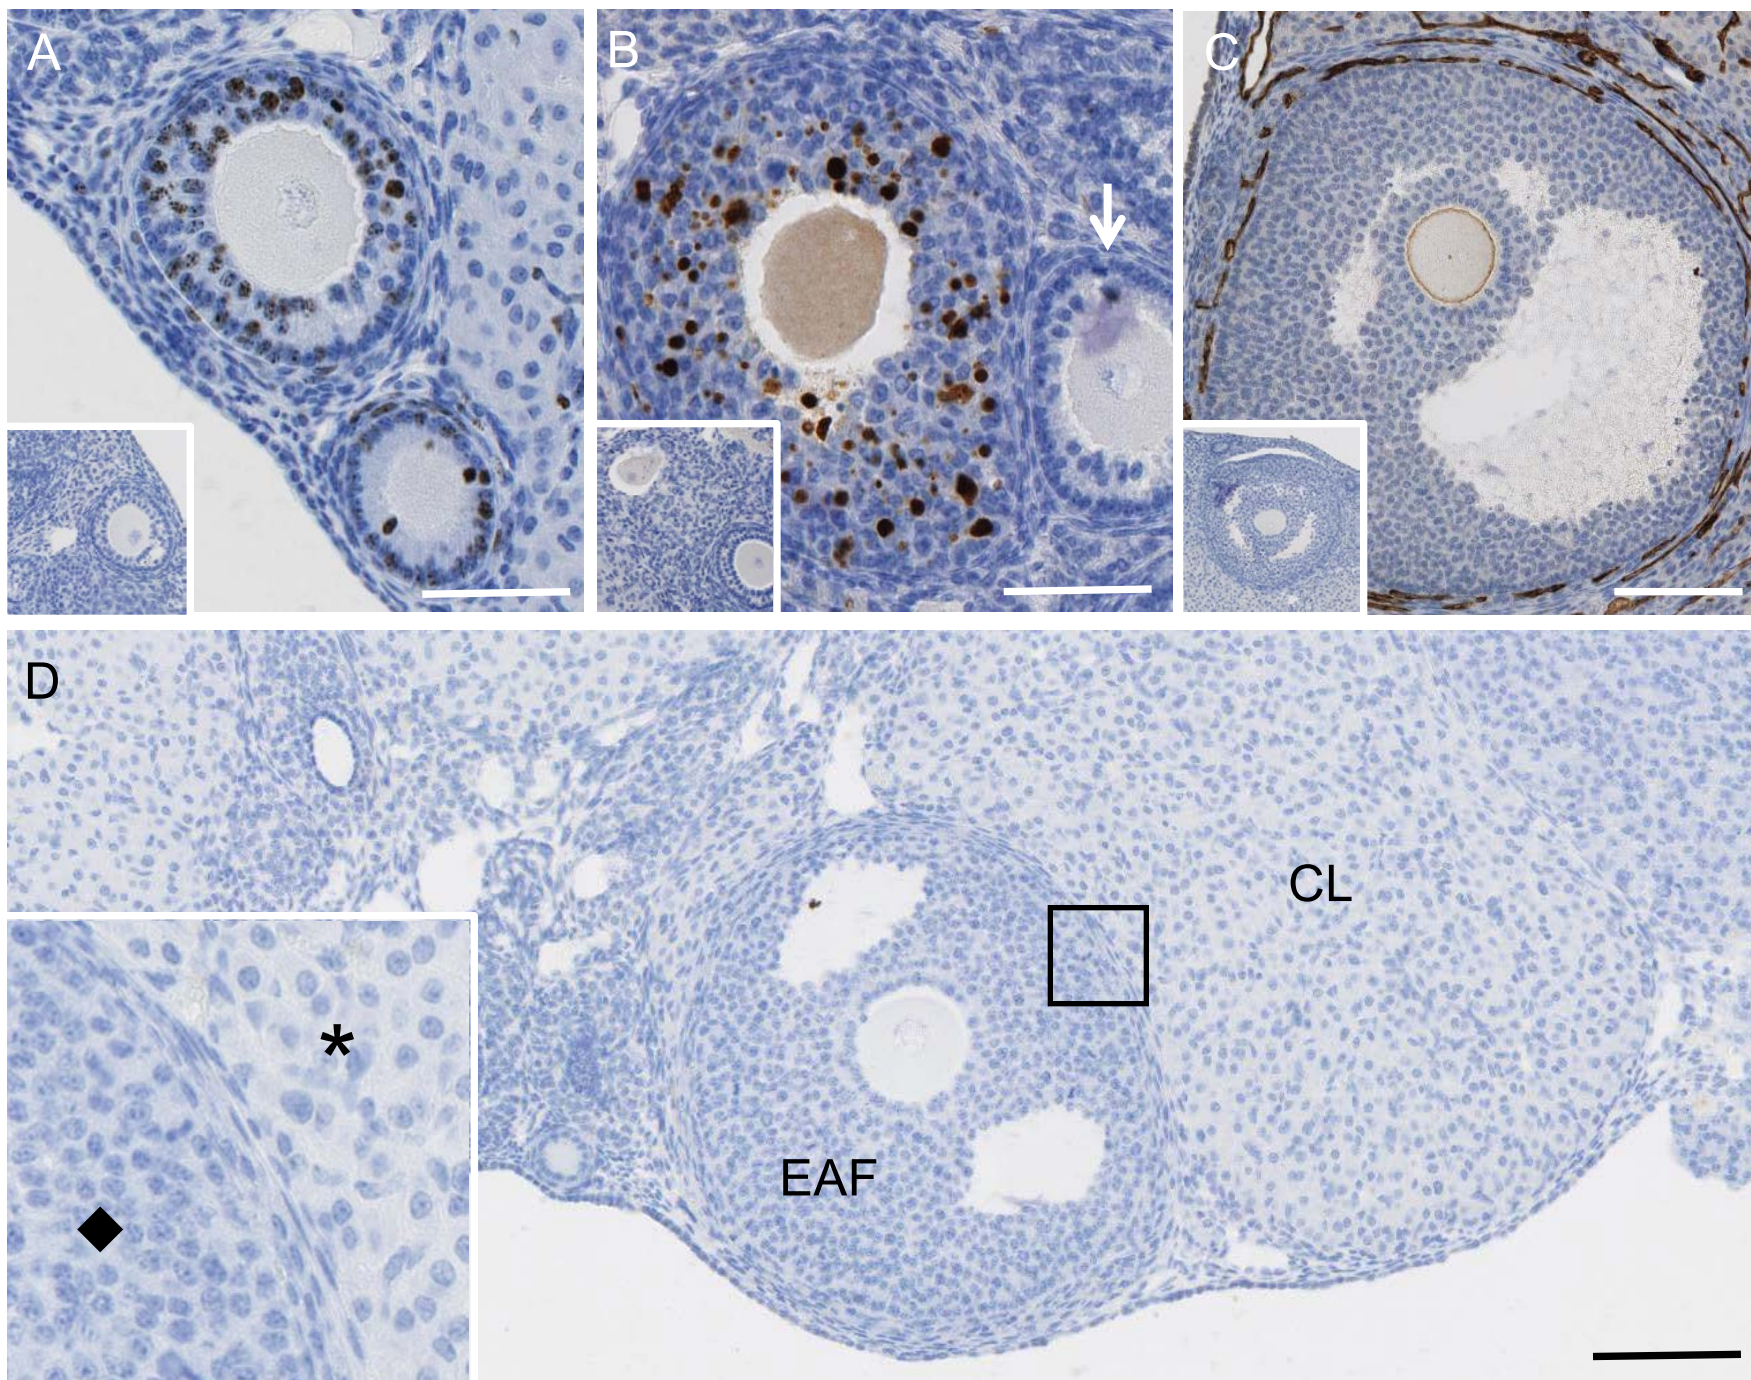

Supplement: NIHMS960551-supplement-04.pdf [file NIHMS960551-supplement-04.pdf]
